# Supplementary material for: Epidemiology of heart failure and long-term follow-up outcomes in a north-African population: Results from the NAtional TUnisian REgistry of Heart Failure (NATURE-HF)
Source: PubMed Central journal article supplement (PMC8136726; doi:10.1371/journal.pone.0251658), 2021-05-20
Supplement: pone.0251658.s002.pdf [file pone.0251658.s002.pdf]

|                               | Reduced EF (n= 888) | mid-range EF (n= 647) | Preserved EF (n= 97) | p-value             |
|-------------------------------|---------------------|-----------------------|----------------------|---------------------|
| <b>Age (years)</b>            |                     |                       |                      |                     |
| Mean ± SD                     | 63.53 ±12.3         | 63.41 ±12.6           | 64.81 ±14.5          | 0.58*               |
| Median [IQR]                  | 64 [19 – 97]        | 63 [25 – 93]          | 65 [21 – 95]         |                     |
| ≥ 75 years (n, %)             | 169 (19.1%)         | 130 (20.1%)           | 25 (25.8%)           | 0.28                |
| Female sex (n, %)             | 224 (25.3%)         | 205 (31.7%)           | 48 (49.5%)           | <10 <sup>-3</sup>   |
| Diabetes (n, %)               | 273 (30.7%)         | 256 (39.6%)           | 34 (35.1%)           | 0.002               |
| Hypertension (n, %)           | 321 (36.2%)         | 285 (44%)             | 46 (47.4%)           | 0.002               |
| Smoking (n, %)                | 212 (29.4%)         | 188 (30.2%)           | 14 (15.9%)           | <10 <sup>-3</sup>   |
| COPD (n, %)                   | 53 (6%)             | 34 (5.3%)             | 8 (8.2%)             | 0.48                |
| Coronary heart disease (n, %) | 380 (42.8%)         | 369 (57.0%)           | 24 (24.7%)           | <10 <sup>-3</sup>   |
| NYHA III (n, %)               | 219 (34.6%)         | 95 (16.1%)            | 32 (40%)             | <10 <sup>-3</sup>   |
| <b>SBP (mmHg)</b>             |                     |                       |                      |                     |
| Mean ± SD                     | 121.69 ±23.1        | 125.07 ±23.4          | 127.27 ±29.5         | <10 <sup>-3</sup> * |
| Median [IQR]                  | 120 [90 – 220]      | 120 [100 – 200]       | 130 [120 – 230]      |                     |
| <b>Heart rate (bpm)</b>       |                     |                       |                      |                     |
| Mean ± SD                     | 79.08 ±15.5         | 76.88 ±15.1           | 81.67 ±17.9          | 0.003*              |
| Median [IQR]                  | 76 [48 – 155]       | 75 [30 – 161]         | 78 [50 – 160]        |                     |
| ≥ 70 bpm (n, %)               | 472 (75.3%)         | 449 (73.2%)           | 83 (87.4%)           | 0.01                |
| Atrial fibrillation (n, %)    | 108 (17%)           | 96 (15.6%)            | 34 (35.8%)           | <10 <sup>-3</sup>   |
| QRS duration >150 msec (n, %) | 40 (6.5%)           | 14 (2.3%)             | 2 (2.1%)             | 0.001               |
| Renal dysfunction (n, %)      | 102 (35.9%)         | 101 (36.3%)           | 15 (45.5%)           | 0.55                |
| Anemia (n, %)                 | 44 (5%)             | 51 (7.9%)             | 8 (8.2%)             | 0.04                |

EF: ejection fraction; \* Kruskal-Wallis test
