# Supplementary material for: Epidemiology of heart failure and long-term follow-up outcomes in a north-African population: Results from the NAtional TUnisian REgistry of Heart Failure (NATURE-HF)
Source: PubMed Central journal article supplement (PMC8136726; doi:10.1371/journal.pone.0251658), 2021-05-20
Supplement: pone.0251658.s004.pdf [file pone.0251658.s004.pdf]

|                                    | <b>Reduced EF (n= 888)</b> | <b>Mid-range EF (n= 647)</b> | <b>Preserved EF (n= 97)</b> | <b>p-value</b>    |
|------------------------------------|----------------------------|------------------------------|-----------------------------|-------------------|
| <b>ACEI/ ARBs (n, %)</b>           | 527 (59.3%)                | 531 (82.1%)                  | 67 (69.1%)                  | <10 <sup>-3</sup> |
| <b>Beta-blockers (n, %)</b>        | 535 (60.2%)                | 507 (78.4%)                  | 52 (53.6%)                  | <10 <sup>-3</sup> |
| <b>Aldosterone blockers (n, %)</b> | 325 (36.6%)                | 126 (19.5%)                  | 19 (19.6%)                  | <10 <sup>-3</sup> |
| <b>Diuretics (n, %)</b>            | 491 (55.3%)                | 294 (45.4%)                  | 67 (69.1%)                  | <10 <sup>-3</sup> |
| <b>Digoxin (n, %)</b>              | 38 (4.3%)                  | 29 (4.5%)                    | 11 (11.3%)                  | 0.007             |

EF: ejection fraction
