# Supplementary material for: Epidemiology of heart failure and long-term follow-up outcomes in a north-African population: Results from the NAtional TUnisian REgistry of Heart Failure (NATURE-HF)
Source: PLOS journal article supplement (doi:10.1371/journal.pone.0251658), 2021-05-20
Supplement: S3 (10.1371/journal.pone.0251658.s003) [file journal.pone.0251658.s003TableS2.pdf]

|                                         | Reduced EF (n= 265) | mid-range EF (n= 113) | Preserved EF (n= 30) | p-value             |
|-----------------------------------------|---------------------|-----------------------|----------------------|---------------------|
| <b>Age (years)</b>                      |                     |                       |                      |                     |
| <b>Mean ± SD</b>                        | 64.20 ±13.1         | 61.15 ±12.4           | 67.37 ±12.4          | 0.01*               |
| <b>Median [IQR]</b>                     | 64 [24 – 91]        | 61 [24 – 86]          | 67.5 [38 – 85]       |                     |
| <b>≥ 75 years (n, %)</b>                | 65 (24.5%)          | 21 (18.6%)            | 12 (40%)             | 0.04                |
| <b>Female sex (n, %)</b>                | 69 (26%)            | 33 (29.2%)            | 15 (50%)             | 0.02                |
| <b>Diabetes (n, %)</b>                  | 103 (38.9%)         | 53 (46.9%)            | 12 (40%)             | 0.34                |
| <b>Hypertension (n, %)</b>              | 103 (38.9%)         | 48 (42.5%)            | 21 (70%)             | 0.005               |
| <b>Smoking (n, %)</b>                   | 67 (29.8%)          | 14 (12.5%)            | 7 (23.3%)            | <10 <sup>-3</sup>   |
| <b>COPD (n, %)</b>                      | 28 (10.6%)          | 12 (10.6%)            | 3 (10%)              | 0.99                |
| <b>Coronary heart disease (n, %)</b>    | 106 (40%)           | 57 (50.4%)            | 7 (23.3%)            | 0.01                |
| <b>NYHA III (n, %)</b>                  | 146 (55.1%)         | 50 (41.2%)            | 20 (66.6%)           | <10 <sup>-3</sup>   |
| <b>SBP (mmHg)</b>                       |                     |                       |                      |                     |
| <b>Mean ± SD</b>                        | 118.91 ±25.8        | 124.36 ±31.7          | 135.10 ±33.3         | <10 <sup>-3</sup> * |
| <b>Median [IQR]</b>                     | 120 [110 – 240]     | 120 [100 – 240]       | 139.5 [130 – 180]    |                     |
| <b>Heart rate (bpm)</b>                 |                     |                       |                      |                     |
| <b>Mean ± SD</b>                        | 93.10 ±21.5         | 81.37 ±20.1           | 82.67 ±27.6          | <10 <sup>-3</sup> * |
| <b>Median [IQR]</b>                     | 90 [45 – 150]       | 76 [39 – 152]         | 75 [40 – 140]        |                     |
| <b>≥ 70 bpm (n, %)</b>                  | 167 (63.0%)         | 89 (78.7%)            | 19 (63.3%)           | <10 <sup>-3</sup>   |
| <b>Atrial fibrillation (n, %)</b>       | 43 (16.2%)          | 27 (23.8%)            | 17 (56.7%)           | 0.001               |
| <b>QRS duration &gt;150 msec (n, %)</b> | 14 (5.2%)           | 6 (5.3%)              | 2 (6.7%)             | 0.56                |
| <b>Renal dysfunction (n, %)</b>         | 38 (14.3%)          | 14 (12.4%)            | 8 (26.6%)            | 0.11                |
| <b>Anemia (n, %)</b>                    | 29 (10.9%)          | 15 (13.3%)            | 11 (36.7%)           | 0.002               |

EF: ejection fraction; \* Kruskal-Wallis test
