# Supplementary material for: Epidemiology of heart failure and long-term follow-up outcomes in a north-African population: Results from the NAtional TUnisian REgistry of Heart Failure (NATURE-HF)
Source: PLOS journal article supplement (doi:10.1371/journal.pone.0251658), 2021-05-20
Supplement: S5 (10.1371/journal.pone.0251658.s005) [file journal.pone.0251658.s005TableS4.pdf]

|                                    | <b>Reduced EF (n= 265)</b> | <b>Mid-range EF (n= 113)</b> | <b>Preserved EF (n= 30)</b> | <b>p-value</b>    |
|------------------------------------|----------------------------|------------------------------|-----------------------------|-------------------|
| <b>ACEI/ ARBs (n, %)</b>           | 145 (54.7%)                | 87 (77%)                     | 21 (70%)                    | <10 <sup>-3</sup> |
| <b>Beta-blockers (n, %)</b>        | 130 (49.1%)                | 86 (76.1%)                   | 18 (60%)                    | <10 <sup>-3</sup> |
| <b>Aldosterone blockers (n, %)</b> | 87 (32.8%)                 | 32 (28.3%)                   | 11 (36.7%)                  | 0.58              |
| <b>Diuretics (n, %)</b>            | 165 (62.3%)                | 78 (69%)                     | 26 (86.7%)                  | 0.02              |
| <b>Digoxin (n, %)</b>              | 8 (3%)                     | 8 (7.1%)                     | 5 (16.7%)                   | 0.003             |

EF: ejection fraction
